# Supplementary material for: A simple and highly efficient route to the synthesis of NaLnF4–Ag hybrid nanorice with excellent SERS performances
Source: Royal Society of Chemistry journal article supplement (doi:10.1039/c2an35758e), 2012-01-01
Supplement: c2an35758e.pdf [file c2an35758e.pdf]

## Supporting Information

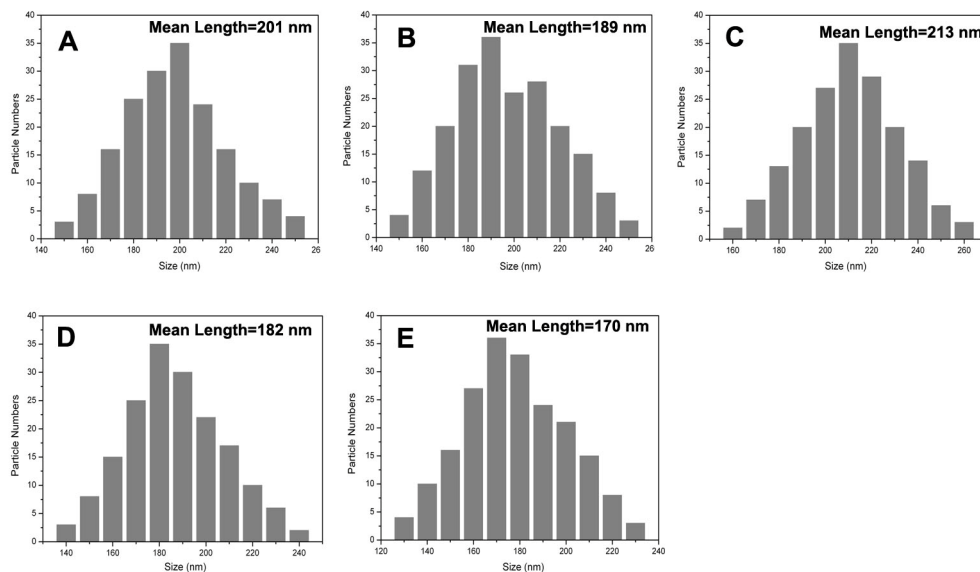

Figure S1. Histogram showing the length distribution of the NaLnF<sub>4</sub> nanorices: (A) NaNdF<sub>4</sub> (B) NaSmF<sub>4</sub>, (C) NaEuF<sub>4</sub>, (D) NaTbF<sub>4</sub>, and (E) NaHoF<sub>4</sub>.

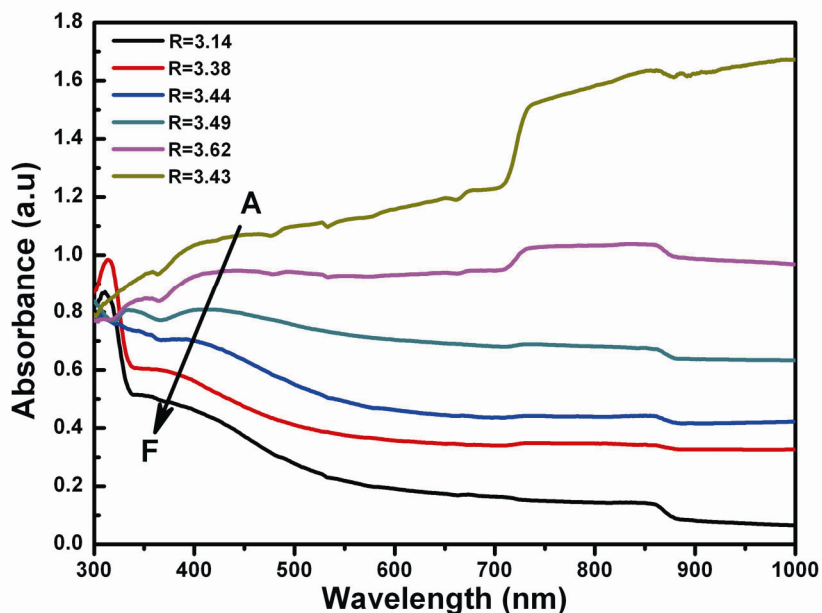

Figure S2. UV/vis absorption spectra of the samples prepared at different sputtering powers for 30 s: (A) 30 W, (B) 50 W, (C) 70 W, (D) 90 W, (E) 120 W, (F) 150 W; Where R is the aspect ratio of the nanorices.

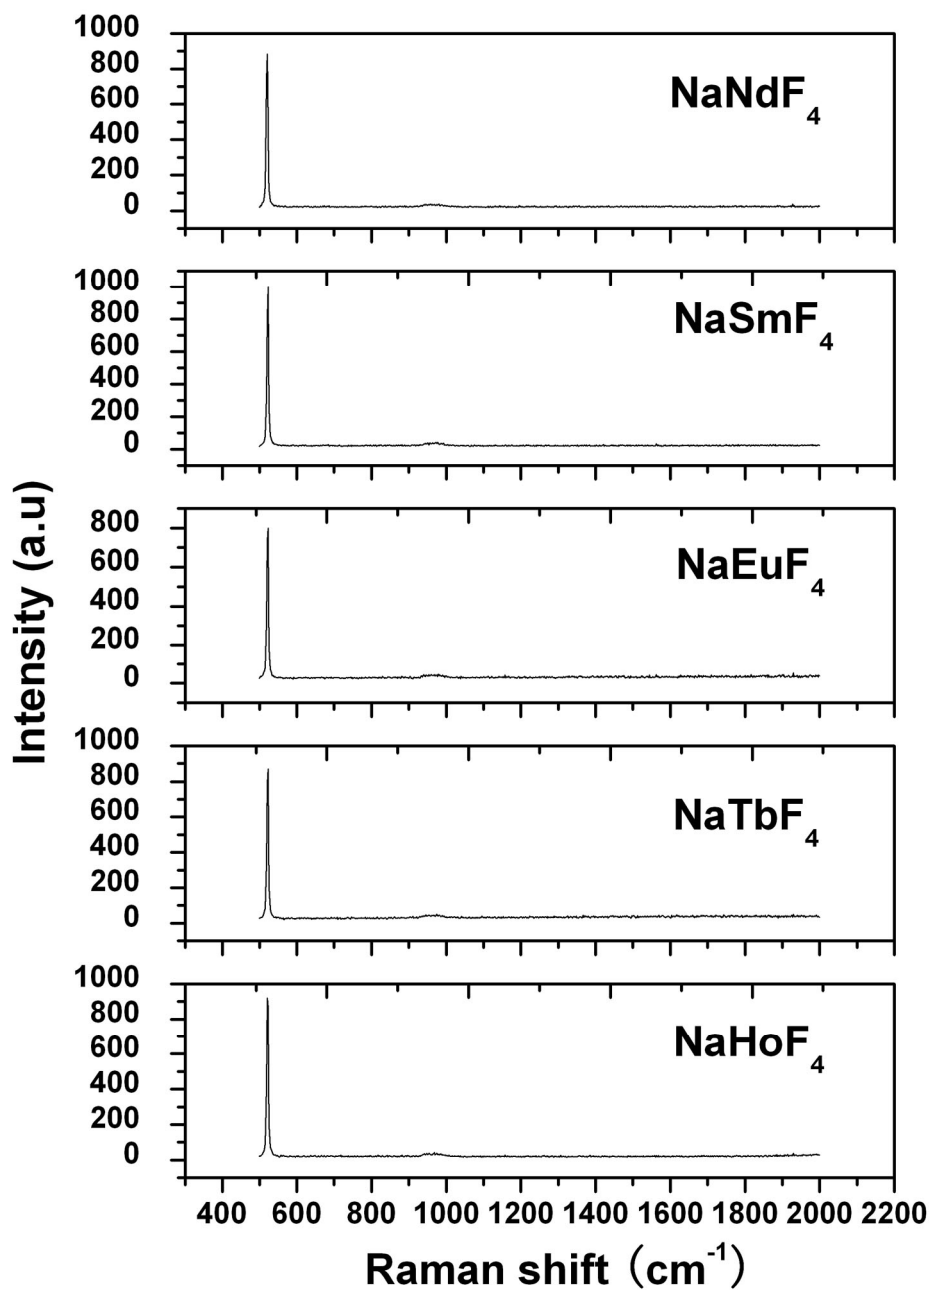

Figure S3. Raman spectra of five pure NaLnF<sub>4</sub> (Ln = Nd, Sm, Eu, Tb, Ho) nanorices assembled on silicon wafers. The two peaks were attributed to silicon wafers signals. No fluorescence emission of NaLnF<sub>4</sub> was detected.

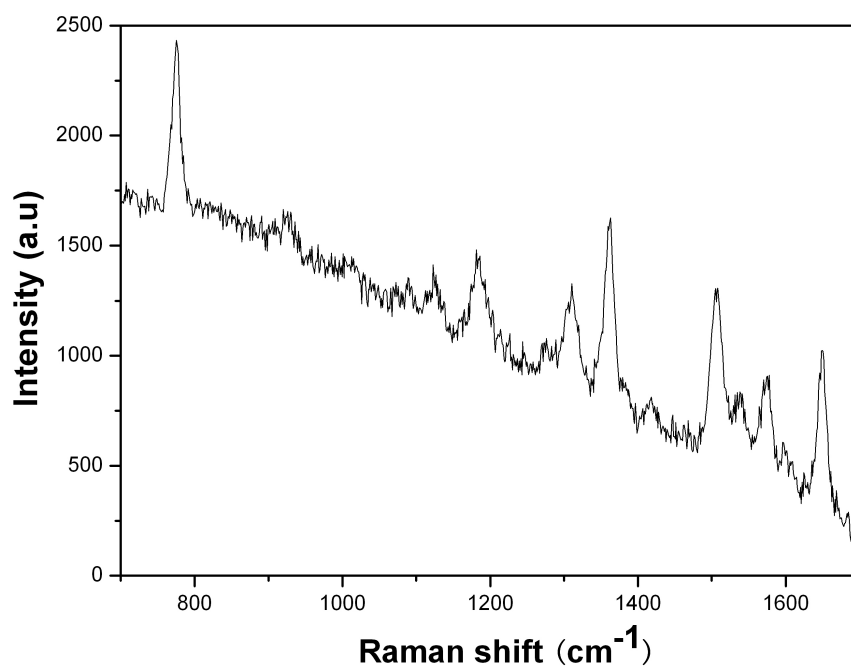

Figure S4. The Raman spectrum of 2 mM aqueous R6G solution. The excitation power is 0.5 mW and the integration time is 60 s.

Table S1. Values of the diameter (D), length (L), shell thickness (d), and aspect ratio (R) of the nanorices prepared at a power of 50 W for different sputtering times (T).

| Sample | <i>T</i> /s | <i>D</i> /nm | <i>L</i> /nm | <i>d</i> /nm | <i>R</i> |
|--------|-------------|--------------|--------------|--------------|----------|
| T0     | 0           | 55.3 ± 3.2   | 189.8 ± 7.1  | 0            | 3.43     |
| T1     | 10          | —            | 189.8 ± 7.1  | —            | 3.43     |
| T2     | 30          | 58.3 ± 2.9   | 211.8 ± 8.9  | 3.0 ± 0.3    | 3.63     |
| T3     | 60          | 60.9 ± 3.5   | 218.1 ± 9.2  | 5.6 ± 0.3    | 3.58     |
| T4     | 90          | 66.1 ± 3.4   | 226.9 ± 9.0  | 10.8 ± 0.2   | 3.43     |
| T5     | 120         | 72.4 ± 3.9   | 235.5 ± 9.8  | 17.1 ± 0.7   | 3.25     |
| T6     | 150         | 74.2 ± 4.4   | 233.9 ± 10.2 | 18.9 ± 1.2   | 3.15     |

Table S2. Values of the diameter (D), length (L), shell thickness (d), and the aspect ratio (R) of the nanorices prepared at different sputtering powers (P) for 30 s.

| Sample | <i>P</i> /W | <i>D</i> /nm | <i>L</i> /nm | <i>d</i> /nm | <i>R</i> |
|--------|-------------|--------------|--------------|--------------|----------|
| P0     | 0           | 55.3 ± 3.2   | 189.8 ± 7.1  | 0            | 3.43     |
| P1     | 30          | —            | 189.8 ± 7.1  | —            | 3.43     |
| P2     | 50          | 56.8 ± 3.6   | 205.5 ± 9.1  | 1.5 ± 0.4    | 3.62     |
| P3     | 70          | 60.3 ± 3.5   | 210.4 ± 6.0  | 5.0 ± 0.3    | 3.49     |
| P4     | 90          | 64.6 ± 3.6   | 222.5 ± 9.9  | 9.3 ± 0.5    | 3.44     |
| P5     | 120         | 67.8 ± 4.1   | 229.3 ± 5.8  | 12.5 ± 0.9   | 3.38     |
| P6     | 150         | 72.9 ± 4.6   | 228.9 ± 10.5 | 17.6 ± 1.4   | 3.14     |

Table S3. Reproducibility data for all of the SERS substrates, including average values (AVERAGE) and standard deviation (STDEVP) for the values in Figure 6B.

|                | <b>30 W</b> | <b>50 W</b> | <b>70 W</b> | <b>90 W</b> | <b>120 W</b> | <b>150 W</b> |
|----------------|-------------|-------------|-------------|-------------|--------------|--------------|
| 1              | 2203        | 4510        | 8012        | 14021       | 20330        | 19500        |
| 2              | 2287        | 4598        | 8089        | 13679       | 20875        | 19304        |
| 3              | 2245        | 4560        | 8124        | 14356       | 20137        | 19279        |
| 4              | 2301        | 4684        | 8019        | 14036       | 19883        | 19599        |
| 5              | 2178        | 4456        | 8310        | 13568       | 19347        | 18907        |
| 6              | 2140        | 4623        | 7923        | 14576       | 20578        | 19750        |
| 7              | 2220        | 4387        | 7845        | 13998       | 19298        | 18992        |
| 8              | 2196        | 4536        | 7795        | 13890       | 20768        | 19020        |
| 9              | 2165        | 4589        | 8145        | 14437       | 19547        | 18769        |
| 10             | 2293        | 4519        | 8058        | 14100       | 19987        | 19480        |
| 11             | 2234        | 4553        | 8134        | 13900       | 19789        | 18964        |
| 12             | 2208        | 4680        | 8281        | 14563       | 20112        | 19550        |
| <b>AVERAGE</b> | 2222        | 4558        | 8061        | 14094       | 20054        | 19259        |
| <b>STDEVP</b>  | 47.5        | 79.2        | 143.6       | 301.9       | 478.6        | 294.8        |

Table S4. Enhancement factor (EF) of R6G molecules absorbed on different NaLnF<sub>4</sub>/Ag nanorices substrates.

| <b>Substrate</b>       | <b>EF</b>            |
|------------------------|----------------------|
| NaNdF <sub>4</sub> /Ag | 3.7×10 <sup>13</sup> |
| NaSmF <sub>4</sub> /Ag | 3.2×10 <sup>13</sup> |
| NaEuF <sub>4</sub> /Ag | 4.1×10 <sup>13</sup> |
| NaTbF <sub>4</sub> /Ag | 3.6×10 <sup>13</sup> |
| NaHoF <sub>4</sub> /Ag | 4.3×10 <sup>13</sup> |
